# Supplementary material for: Exchange bias and Verwey transition in Fe5C2/Fe3O4 core/shell nanoparticles
Source: Royal Society of Chemistry journal article supplement (doi:10.1039/d1nr04520b), 2021-01-01
Supplement: d1nr04520b1.pdf [file d1nr04520b1.pdf]

## Supplementary Information

### Exchange bias and Verwey transition in $\text{Fe}_5\text{C}_2/\text{Fe}_3\text{O}_4$ core/shell nanoparticles

M. Xing,<sup>a</sup> J. Mohapatra,<sup>a</sup> J. Elkins,<sup>a</sup> D. Guragain,<sup>b</sup> Sanjay R Mishra,<sup>b</sup> and J. Ping Liu<sup>a,\*</sup>

a. Department of Physics, The University of Texas at Arlington, Arlington, Texas 76019, USA

b. Department of Physics and Materials Science, The University of Memphis, Memphis, TN 38152

*\*To whom correspondence should be addressed. E-mail: pliu@uta.edu (J. Ping Liu). Phone: +1-817-272-2815*

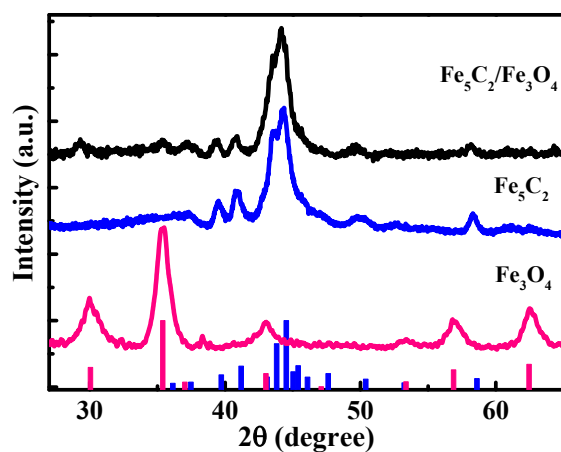

**Fig. S1.** The XRD patterns of pure  $\text{Fe}_3\text{O}_4$  and  $\text{Fe}_5\text{C}_2$  nanoparticles, and  $\text{Fe}_5\text{C}_2/\text{Fe}_3\text{O}_4$  core/shell nanoparticles. The  $\text{Fe}_3\text{O}_4$  crystallizes in a spinel cubic structure, while the  $\text{Fe}_5\text{C}_2$  crystallizes in a monoclinic structure, according to the ICDD card no. 001-1111 and 051-0997, respectively.

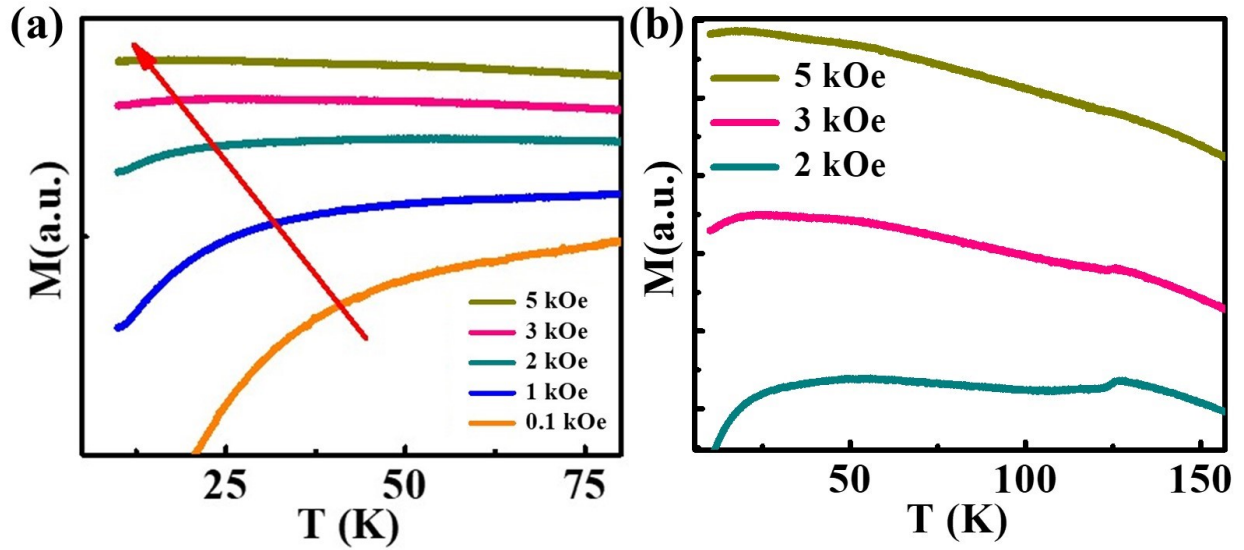

**Fig. S2.** (a) Field dependent blocking behavior of  $Fe_3O_4$  shell in  $Fe_5C_2/Fe_3O_4$  core/shell nanoparticles. (b) Effect of magnetic field on the Verwey transition temperature.

**Table S1:** Mössbauer parameters: Hyperfine Field ( $H_{hf}$ ), Quadrupole Splitting ( $Q_S$ ), and Isomer Shift ( $IS$ ) for  $Fe_5C_2/Fe_3O_4$  core/shell nanoparticles at room temperature.

| Phases    | Iron sites | Hyperfine field ( $H_{hf}$ ), kOe | Quadrupole splitting ( $Q_S$ ), mm/s | Isomer shift ( $IS$ ), mm/s |
|-----------|------------|-----------------------------------|--------------------------------------|-----------------------------|
| $Fe_3O_4$ | sextet A   | 486.981                           | -0.0092                              | 0.289                       |
|           | sextet B   | 455.997                           | -0.061                               | 0.693                       |
| $Fe_5C_2$ | sextet I   | 188.55                            | -0.0317                              | 0.231                       |
|           | sextet II  | 215.63                            | 0.228                                | 0.269                       |
|           | sextet III | 215.27                            | -0.0735                              | 0.23                        |
